# The Role of Recombination in Evolutionary Rescue

Hildegard Uecker<sup>1</sup>, Joachim Hermisson<sup>2</sup>

<sup>1</sup> Institute of Science and Technology Austria (IST Austria), 3400 Klosterneuburg, Austria

<sup>2</sup> Mathematics and Biosciences Group, Faculty of Mathematics and Max F. Perutz Laboratories, University of Vienna, 1090 Vienna, Austria

Running title: Recombination in evolutionary rescue

Keywords: rapid adaptation, epistasis, drift, population dynamics, ecology

Corresponding author:

Hildegard Uecker

Institute of Science and Technology Austria (IST Austria)

Am Campus 1

3400 Klosterneuburg

Austria

Phone: +43 (0)2243 9000 4711

Email: [Hildegard.Uecker@ist.ac.at](mailto:Hildegard.Uecker@ist.ac.at)

## Abstract

1  
2       How likely is it that a population escapes extinction through adaptive evolution? The  
3 answer to this question is of great relevance in conservation biology, where we aim at  
4 species' rescue and the maintenance of biodiversity, and in agriculture and epidemiology,  
5 where we seek to hamper the emergence of pesticide or drug resistance. By reshuffling  
6 the genome, recombination has two antagonistic effects on the probability of evolutionary  
7 rescue: it generates and it breaks up favorable gene combinations. Which of the two effects  
8 prevails, depends on the fitness effects of mutations and on the impact of stochasticity on  
9 the allele frequencies. In this paper, we analyze a mathematical model for rescue after a  
10 sudden environmental change when adaptation is contingent on mutations at two loci. The  
11 analysis reveals a complex nonlinear dependence of population survival on recombination.  
12 We moreover find that, counterintuitively, a fast eradication of the wildtype can promote  
13 rescue in the presence of recombination. The model also shows that two-step rescue is not  
14 unlikely to happen and can even be more likely than single-step rescue (where adaptation  
15 relies on a single mutation), depending on the circumstances.

## 16 Introduction

17 Populations facing severe environmental change need to adapt rapidly to the new conditions,  
18 or they will go extinct. The most prominent examples for evolutionary rescue in natural  
19 populations are provided by failed eradication of pathogens or pests that develop resistance  
20 against drugs or pesticides. Understanding which factors drive the evolution of resistance has  
21 been a concern since the application of drugs and pesticides. In recent years, the topic of  
22 evolutionary rescue has attracted increasing interest of evolutionary biologists at a broader  
23 front. Both theoretical models and laboratory experiments have been used to investigate the  
24 influence of many genetic or environmental factors on the survival probability of an endangered  
25 population, e.g., the importance of standing genetic variation, sexual reproduction, the history  
26 of stress, the severity and speed of environmental deterioration, or population structure (BELL  
27 and COLLINS (2008); BELL and GONZALEZ (2009, 2011); ORR and UNCKLESS (2008, 2014);  
28 AGASHE *et al.* (2011); LACHAPELLE and BELL (2012); GONZALEZ and BELL (2013); UECKER  
29 *et al.* (2014); see also the reviews by ALEXANDER *et al.* (2014) and CARLSON *et al.* (2014)).  
30 Despite significant progress, a largely open area in research on rescue concerns the influence of  
31 recombination on the probability of population survival.

32 Recombination has two fundamental effects on adaptation that work against each other: it  
33 brings favorable gene combinations together but it also breaks them up. Recombination hence  
34 has the potential both to promote rescue or to impede it. In classical population genetics  
35 (assuming a constant population size), the interplay of the two opposing effects of recomb-

36 nation has been an intensively studied problem for decades (e.g., reviewed in BARTON and  
37 CHARLESWORTH, 1998; OTTO, 2009; HARTFIELD and KEIGHTLEY, 2012). Fundamentally, re-  
38 combination acts to reduce the linkage disequilibrium between alleles. For two loci with two  
39 alleles each, recombination increases the number of double mutants if the linkage disequilib-  
40 rium (LD) between the mutant alleles is negative; it decreases them when LD is positive; and  
41 it has no effect if the loci are in linkage equilibrium. A major source of linkage disequilibria is  
42 epistasis with negative epistasis leading to negative LD and positive epistasis leading to posi-  
43 tive LD (FELSENSTEIN, 1965; KOUYOS *et al.*, 2007). For evolutionary rescue, the shift of the  
44 environment from original to perturbed conditions may lead to a change in epistasis during  
45 the course of evolution, which adds new aspects to the problem of how recombination affects  
46 adaptation.

47 Combination drug therapy (as well as the use of herbicide mixtures in agriculture) seeks to  
48 limit the evolution of resistance by increasing the number of mutations that are required to  
49 restore fitness above one. Understanding under which conditions recombination can undermine  
50 this strategy is of great relevance to plan a successful treatment. Consequently, the effect of  
51 recombination on the evolution of drug resistance has attracted considerable attention from epi-  
52 demiologists, in particular with respect to resistance in HIV (BRETSCHER *et al.*, 2004; FRASER,  
53 2005; CARVAJAL-RODRÍGUEZ *et al.*, 2007; KOUYOS *et al.*, 2009). However, most epidemiologi-  
54 cal models are deterministic and focus on the time to resistance rather than on the probability  
55 of resistance (BRETSCHER *et al.*, 2004; FRASER, 2005). An exception is the simulation study

56 by KOUYOS *et al.* (2009), which incorporates stochasticity and allows populations to go extinct.  
57 Their study demonstrates how the population dynamics affects the emergence of linkage dis-  
58 equilibria and hence the influence of recombination on the probability and time to resistance,  
59 finding that recombination usually slows down the evolution of resistance. However, the model  
60 is specific to the complex epidemiological dynamics of HIV and cannot be used to draw general  
61 conclusions about the role of recombination in evolutionary rescue.

62 In a general evolutionary context, theoretical models of rescue where population genetics and  
63 population dynamics are intertwined have mainly followed two routes. In one class of models,  
64 adaptation relies on changes at just a single locus, and recombination consequently does not  
65 appear (GOMULKIEWICZ and HOLT, 1995; IWASA *et al.*, 2003, 2004; BELL and COLLINS, 2008;  
66 ORR and UNCKLESS, 2008, 2014; MARTIN *et al.*, 2013; UECKER *et al.*, 2014). The second class  
67 of models, motivated by conservation biology, is based on a quantitative genetics approach  
68 where (infinitely) many loci of small effect determine the fitness of an organism (PEASE *et al.*,  
69 1989; LYNCH *et al.*, 1991; LANDE and SHANNON, 1996; BÜRGER and LYNCH, 1995; POLECHOVÁ  
70 *et al.*, 2009; DUPUTIÉ *et al.*, 2012). These models usually do not incorporate an explicit genetic  
71 architecture that would allow for the investigation of the effect of recombination or assume  
72 linkage equilibrium. In their review, CARLSON *et al.* (2014) refer to a single study – SCHIFFERS  
73 *et al.* (2013) – for the effect of linkage on the probability of rescue. In their simulation study  
74 of an explicit multi-locus model, SCHIFFERS *et al.* (2013) compare rescue probabilities for the  
75 two extreme cases of complete linkage and free recombination. In contrast to KOUYOS *et al.*

76 (2009), they find that linkage significantly decreases the probability of rescue. However, the  
77 study omits the range of intermediate linkage, and moreover, the model is tailored to consider  
78 a highly specific ecological situation of climate change in a spatially structured environment.  
79 Just as the study by KOUYOS *et al.* (2009), it is not designed to serve as a baseline model.

80 In this paper, we set up and analyze a generic two-locus model for the role of recombination in  
81 evolutionary rescue. A population experiences a sudden severe environmental change; adapta-  
82 tion relies on two mutations and can both happen either from the standing genetic variation  
83 or from de-novo mutations. There are hence two phases – the time before and the time af-  
84 ter the environmental change – during which recombination acts to increase or decrease the  
85 chances of population survival, depending on the fitness scheme and the strength of drift. We  
86 provide an accurate analytical framework based on branching process theory, complemented  
87 by computer simulations, to obtain an intuitive understanding of the principles underlying res-  
88 cue under these conditions. We conclude with two notable observations that might contradict  
89 spontaneous intuition and that could be of practical relevance.

## 90 **The model**

91 Consider a panmictic population of variable size  $N = N(t)$  that faces the risk of extinction after  
92 a sudden environmental change. Individuals are haploid during their selective phase. Their  
93 fitness before and after the change depends on two loci with two alleles each such that there are  
94 four genotypes: the wildtype  $ab$ , single mutant types  $Ab$  and  $aB$ , and the double mutant *rescue*

95 *type AB*. Each generation, each individual produces a large number  $X$  of gametes. Mutations  
 96 happen with probability  $u$  at each locus and in both directions. Gametes form diploid zygotes,  
 97 which produce haploid offspring. The recombination probability between the two loci is  $r$ .  
 98 Thereafter, selection takes place. By  $n_{ab}$ ,  $n_{Ab}$ ,  $n_{aB}$ , and  $n_{AB}$ , we denote the number of the  
 99 respective genotypes in the population; hence  $N = n_{ab} + n_{Ab} + n_{aB} + n_{AB}$ . We obtain for the  
 100 number of haploids after reproduction but before selection:

$$\begin{aligned}
 \nu_{ab}X &:= \left( \hat{n}_{ab} - r\hat{D}N \right) X, \\
 \nu_{Ab}X &:= \left( \hat{n}_{Ab} + r\hat{D}N \right) X, \\
 \nu_{aB}X &:= \left( \hat{n}_{aB} + r\hat{D}N \right) X, \\
 \nu_{AB}X &:= \left( \hat{n}_{AB} - r\hat{D}N \right) X
 \end{aligned} \tag{1}$$

101 with the proportion of each genotype after mutation but before recombination

$$\begin{aligned}
 \hat{n}_{ab} &:= (1-u)^2 n_{ab} + (1-u)u n_{Ab} + (1-u)u n_{aB} + u^2 n_{AB}, \\
 \hat{n}_{Ab} &:= u(1-u) n_{ab} + (1-u)^2 n_{Ab} + u^2 n_{aB} + (1-u)u n_{AB}, \\
 \hat{n}_{aB} &:= u(1-u) n_{ab} + (1-u)^2 n_{aB} + u^2 n_{Ab} + (1-u)u n_{AB}, \\
 \hat{n}_{AB} &:= u^2 n_{ab} + (1-u)u n_{Ab} + (1-u)u n_{aB} + (1-u)^2 n_{AB}
 \end{aligned} \tag{2}$$

102 and the linkage disequilibrium (after mutation)

$$\hat{D} = \frac{1}{N^2} (\hat{n}_{ab}\hat{n}_{AB} - \hat{n}_{Ab}\hat{n}_{aB}). \tag{3}$$



103 Before the environmental change, the population is well-adapted to its environment and the  
104 population size is constant,  $N(t) = N_0$ . The numbers of the respective genotypes in the new  
105 generation are determined by multinomial sampling of  $N_0$  individuals, where the probability to  
106 sample an individual of type  $i$  ( $i \in \{ab, Ab, aB, AB\}$ ) is given by

$$\frac{(1 + \sigma_i)\nu_i}{\sum_i(1 + \sigma_i)\nu_i}. \quad (4)$$

107 The selection coefficients  $\sigma_i$  quantify selection before the environmental change. We set  $\sigma_{ab} = 0$   
108 and assume that all mutants are deleterious relative to the wildtype,  $\sigma_{aB}, \sigma_{Ab}, \sigma_{AB} < 0$ . After  
109 the switch in the environment, the population size is variable and will usually initially decline.  
110 Individuals of type  $i$  survive with probability  $(1 + s_i)/X$  such that their number after selection  
111 is Poisson distributed with parameter

$$\nu_i(1 + s_i). \quad (5)$$

112 The  $s_i$  parametrize the expected growth (for  $s_i > 0$ ) or decline ( $s_i < 0$ ) of a type- $i$  population  
113 after the environmental change. Usually, we assume that only the rescue type can grow under  
114 these conditions ( $s_{AB} > 0$ ), and  $s_{ab}, s_{Ab}, s_{aB}$  are all  $< 0$ . Epistasis before and after the

115 environmental change is measured as the deviation of fitnesses from multiplicativity, i.e.,

$$\begin{aligned} E_1 &:= (1 + \sigma_{ab})(1 + \sigma_{AB}) - (1 + \sigma_{Ab})(1 + \sigma_{aB}) \\ &= \sigma_{AB} - (\sigma_{Ab} + \sigma_{aB} + \sigma_{Ab}\sigma_{aB}), \end{aligned} \tag{6}$$

$$E_2 := (1 + s_{ab})(1 + s_{AB}) - (1 + s_{Ab})(1 + s_{aB}),$$

116 respectively (see KOUYOS *et al.* (2007) for the definition of epistasis in discrete vs continuous  
117 time models). If the total number of individuals after selection is larger than  $N_0$ , it is reduced  
118 to  $N_0$ . Density regulation hence occurs via a hard carrying capacity, and there is no density  
119 dependence for  $N \leq N_0$ .

120 The simulations follow this scheme. We start with a population that is entirely composed of  
121 wildtype individuals and let it evolve for  $10^4$  generations such that mutation-selection balance is  
122 reached before the environment changes (increasing the number of generations did not influence  
123 the results). We follow the population dynamics after the environmental change either until  
124 the population has gone extinct or until the number of  $AB$  mutants has grown to 90% carrying  
125 capacity and the population can be considered as rescued (in a few cases, we modify the criterion  
126 for “rescue” to reduce the simulation time; this is then explicitly stated). The simulation code  
127 is written in the  $C$  programming language, making use of the *Gnu Scientific Library* (GALASSI  
128 *et al.*, 2009).

## 129 Analysis and Results

130 Our analytical approach to estimate the rescue probability combines deterministic and stochas-  
131 tic aspects. We focus on populations that are initially large and (mostly) describe the dynamics  
132 of the wildtype and the single mutants deterministically. Even if the initial population size is  
133 large, however, the number of rescue type individuals ( $AB$  double mutants) is potentially small  
134 and subject to strong stochasticity. This stochastic dynamics depends on all genotype frequen-  
135 cies in the population, which typically change over time in response to environmental change  
136 and selection. We address the stochasticity in the number of  $AB$  mutants by means of branch-  
137 ing process theory. The basic mathematical ingredients used are summarized in Appendix S1;  
138 Appendix S2 and Appendix S3 contain the derivations of our main results. In Appendix S4, we  
139 briefly test the limits of our approximations. Since selection is potentially strong, details of the  
140 life cycle need to be taken into account in order to arrive at quantitatively accurate analytical  
141 predictions. We take care of these details in the Appendix but neglect them in the main text  
142 below, where we summarize our main results.

143 The probability of evolutionary rescue depends on two factors: the number of rescue types that  
144 are generated and their establishment probability in the population after the environmental  
145 change. Both quantities are affected by recombination. Mutant genotypes can either be present  
146 in the population prior to the switch in the environment or newly arise during population  
147 decline. Double mutants, in particular, can either be generated by mutation from single mutants  
148 with a constant probability per individual or by recombination of two single mutants with

149 a probability that depends on the (time-dependent) genotype composition in the population.  
150 Which route of rescue is most relevant depends on the model parameters for mutation, selection,  
151 recombination, and drift. In this section, we progressively describe all routes to rescue. We start  
152 with a scenario where single mutants are lethal in the new environment. In that case, rescue  
153 entirely relies on double mutants from the standing genetic variation (we assume throughout  
154 the analysis that the mutation probability is so small that a direct transition from the wildtype  
155 to the double mutant can be neglected). Next, we assume that one of the single mutants is  
156 sufficiently viable in the new environment that it can still generate the rescue type by mutation  
157 after the environmental change. In both of these scenarios, recombination can be beneficial  
158 or detrimental in the old environment due to its effect on the number of rescue genotypes  
159 in the standing genetic variation; its effect after the change in the environment is, however,  
160 always detrimental (recombination with the wildtype reduces the establishment probability of  
161 the rescue type). This is different if both single mutants are viable under the new conditions;  
162 in that case, recombination increases the rate at which the rescue type is generated after the  
163 environmental change, and – depending on the fitness scheme – this can outweigh the negative  
164 effect of recombination. Finally, if single mutants have a fitness larger than one, formation  
165 of the double mutant is not required for rescue. We briefly discuss when it is appropriate to  
166 neglect its generation in this case. The fitness schemes used in the following four sections are  
167 summarized in Table 1.

|           | scheme 1     | scheme 2     | scheme 3         |                     | scheme 4         |
|-----------|--------------|--------------|------------------|---------------------|------------------|
|           |              |              | scenario 1       | scenario 2          |                  |
| <b>ab</b> | $s_{ab} < 0$ | $s_{ab} < 0$ | lethal           | $s_{ab} \leq s < 0$ | lethal           |
| <b>Ab</b> | lethal       | $s_{Ab} < 0$ | $s_{Ab} = s < 0$ | $s_{Ab} = s < 0$    | $s_{Ab} = s > 0$ |
| <b>aB</b> | lethal       | lethal       | $s_{aB} = s < 0$ | $s_{aB} = s < 0$    | $s_{Ab} = s > 0$ |
| <b>AB</b> | $s_{AB} > 0$ | $s_{AB} > 0$ | $s_{AB} > 0$     | $s_{AB} > 0$        | $s_{AB} > s$     |

Table 1: Fitness schemes used in “Analysis and Results”.

## 168 **Scheme 1: Single mutants are lethal in the new environment**

169 Within our first scheme, we assume that single mutants are lethal in the new environment  
 170 ( $s_{Ab} = s_{aB} = -1$ ). This means that de-novo generation of the rescue type is prevented after  
 171 the change in the environment and rescue – if it happens – happens from double mutants in  
 172 the standing genetic variation.

173 Before the change in the environment, single mutants segregate in the population at mutation-  
 174 selection balance, which we approximate deterministically as constant in time,  $\bar{n}_{Ab} \approx \frac{uN_0}{-\sigma_{Ab}}$ ,  
 175  $\bar{n}_{aB} \approx \frac{uN_0}{-\sigma_{aB}}$  (ignoring the influence of recombination on the frequency of single mutants).  
 176 Double mutants are generated from single mutants by either recombination or mutation, at a  
 177 total rate of  $\sim u(\bar{n}_{Ab} + \bar{n}_{aB}) + r \frac{\bar{n}_{Ab}\bar{n}_{aB}}{N_0}$ . In the presence of wildtype individuals, the double  
 178 mutant suffers from recombination with the wildtype and gets broken up at rate  $\sim \frac{n_{ab}}{N}r \approx r$ ,  
 179 leading to an “effective fitness” of  $\approx 1 + \sigma_{AB} - r < 1$ . Using this, we can describe the number  
 180 of  $AB$  mutants in the standing genetic variation,  $n_{AB}$  by a subcritical branching process with  
 181 immigration (see Appendix S1.2).

182 The establishment probability of the rescue type after the environmental change depends on  
183 the dynamics of the wildtype. If the wildtype is lethal ( $s_{ab} = -1$ ),  $AB$  mutants are not broken  
184 up by recombination and establish with probability  $p_{\text{est}}^{(AB)} \approx 2s_{AB}$  (HALDANE, 1927). If the  
185 wildtype disappears slowly, with expected extinction time much larger than the typical estab-  
186 lishment time of a rescue type, the growth parameter of a rare rescue type is  $\sim s_{AB} - r$  and  
187 we can approximate  $p_{\text{est}}^{(AB)} \approx 2 \max[(s_{AB} - r), 0]$ . In an intermediate parameter range, where  
188 the establishment time of the rescue type and the extinction time of the wildtype cannot be  
189 separated, we need a more refined approximation (see Appendix S1.2, Eq. (S1.29)): We derive  
190 this approximation by treating the wildtype extinction time as a stochastic variable, whose dis-  
191 tribution can be estimated. Conditioned on this extinction time, the establishment probability  
192 of the rescue type follows from a time-dependent branching process (UECKER and HERMIS-  
193 SON, 2011). Finally, for a given  $n_{AB}$  at the time of environmental change, the probability of  
194 evolutionary rescue follows as

$$P_{\text{rescue}}(n_{AB}) \approx 1 - e^{-n_{AB}p_{\text{est}}^{(AB)}}, \quad (7)$$

195 which needs to be averaged over the distribution of  $n_{AB}$ .

196 Fig. 1 shows the probability of evolutionary rescue for the three possible fitness schemes prior  
197 to the environmental change: no epistasis, negative epistasis, and positive epistasis. After the  
198 environmental change, epistasis is positive (or zero) since single mutants are lethal. Panels A–C  
199 show the behavior for a very large population size ( $N_0 = 10^8$ ), where all genotype frequencies

200 prior to the environmental change are close to deterministic; in Panels D–F, the population  
201 size is two orders of magnitude smaller ( $N_0 = 10^6$ ), and stochasticity in the number of double  
202 mutants becomes important (see below).

203 If the wildtype is lethal in the new environment (filled circles), recombination affects the prob-  
204 ability of rescue only via its effect on the standing genetic variation, and it is instructive to  
205 consider this case first. In Appendix S3.1, we derive an approximation for rescue if we can treat  
206 all genotype frequencies in the standing genetic variation deterministically (see Eq. (S3.4)); with  
207  $\sigma_{Ab} = \sigma_{aB} = \sigma$  and  $\sigma_{AB} = (\sigma_{Ab} + \sigma_{aB} + \sigma_{Ab}\sigma_{aB}) + E_1$ , and assuming that all selection coefficients  
208 are small, we obtain:

$$P_{\text{rescue}}^{\text{det}} \approx 1 - e^{-2s_{AB} \frac{u^2 N_0}{\sigma^2} \frac{r-2\sigma}{r-2\sigma-E_1}}. \quad (8)$$

209 From this, we can read off that for  $E_1 = 0$  (no epistasis, Fig. 1A), the rescue probability is  
210 independent of recombination; for  $E_1 < 0$  (negative epistasis, Fig. 1B), it increases with  $r$ ; and  
211 for  $E_1 > 0$  (positive epistasis, Fig. 1C), it decreases with  $r$ . For  $r = 0$ , the rescue probability de-  
212 pends strongly on epistasis ( $P_{\text{rescue}}^{\text{det}} \approx 1 - e^{-2s_{AB} \frac{u^2 N_0}{\sigma^2} \frac{2\sigma}{2\sigma+E_1}}$ ), while for  $r \gg \max[|2\sigma|, |2\sigma + E_1|]$ ,  
213 the rescue probability becomes independent of epistasis ( $P_{\text{rescue}}^{\text{det}} \approx 1 - e^{-2s_{AB} \frac{u^2 N_0}{\sigma^2}}$ ). This is  
214 expected from deterministic theory: with no epistasis, the population is in linkage equilibrium  
215 and recombination has no effect. Negative epistasis leads to negative linkage disequilibrium  
216 (LD) and recombination is favorable since it increases the number of  $AB$  mutants. Vice versa,  
217 positive epistasis leads to positive linkage disequilibrium and recombination is deleterious since  
218 it decreases the number of  $AB$  mutants (FELSENSTEIN, 1965). For sufficiently strong recombi-

219 nation, the population approaches linkage equilibrium irrespective of epistasis.

220 In Panels D–F, population size is smaller by two orders of magnitude. The growth rate of the  
221 rescue genotype is two orders of magnitude larger such that  $s_{AB}N_0$  is the same as in Panels A–  
222 C. The deterministic prediction for the rescue probability Eq. (8) is hence unchanged. However,  
223 although the population size before the decline contains  $10^6$  individuals, stochastic fluctuations  
224 in the number of double mutants  $n_{AB}$  become important in this regime. Symmetric fluctuations  
225 in  $n_{AB}$  do not have symmetric effects on rescue, since the rescue probability (Eq. (7)) is a  
226 concave function of  $n_{AB}$  (it does not help getting rescued twice). Negative fluctuations thus  
227 have a stronger effect on  $P_{\text{rescue}}$  than positive fluctuations and drift reduces the probability  
228 of evolutionary rescue. This effect is most pronounced for tight linkage, but is attenuated by  
229 recombination (e.g. Panel D). Since recombination pulls genotype frequencies closer to linkage  
230 equilibrium, it overall dampens fluctuations in LD and along with it fluctuations in  $n_{AB}$ . For  
231 positive epistasis prior to the environmental change (Panel F), this results in a non-monotonic  
232 dependence of  $P_{\text{rescue}}$  on recombination. For small  $r$  ( $r \lesssim 2|\sigma|$ , see Eq. (8)), recombination is  
233 deleterious since it breaks up the positive LD built up by epistasis; for larger  $r$ , the positive  
234 effect of recombination (attenuating drift) dominates. Fig. S3.1 in Appendix S3 disentangles  
235 the effects of epistasis and drift.

236 If the wildtype is not lethal in the new environment (open symbols), recombination is deleterious  
237 after the environmental change. Note that even a slight increase of the wildtype fitness  
238 above lethality drastically influences the outcome for recombination  $r \gtrsim s_{AB}$  (empty triangles).



239 The presence of the wildtype during the first few generations after the environmental change  
240 is sufficient to break up double mutants and to hamper their establishment probability signif-  
241 icantly. If the wildtype is quite fit (open circles) and recombination strong ( $r \gtrsim s_{AB}$ ), rescue  
242 becomes impossible. This corresponds to observations in populations of constant size where  
243 the crossing of fitness valleys is prevented by strong recombination (CROW and KIMURA, 1965;  
244 JAIN, 2010; WEISSMAN *et al.*, 2010).

245 For a slowly decaying wildtype, the results are robust to deviations of the fitness of single  
246 mutants from strict lethality; however, for a lethal wildtype, chances of rescue increase con-  
247 siderably when single mutants have a fitness slightly larger than zero (see Appendix S3.1 and  
248 Fig. S3.2; see below for the scenario  $s_{Ab} = s_{aB} = s$  and  $s_{ab} = -1$ ).

## 249 **Scheme 2: One single mutant is viable, the other is lethal**

250 Viability of one of the single mutants, say  $Ab$ , opens up new pathways to rescue since new  
251 double mutants can be generated by mutation after the switch in the environment. Rescue can  
252 occur via (a) double mutants from the standing genetic variation as in the previous paragraph,  
253 (b) mutation of single mutants from the standing genetic variation after the environmental  
254 change, and – if the wildtype is viable in the new environment – (c) two-step mutation after  
255 the environmental change (i.e., generation of single mutants and subsequently double mutants,  
256 both by de-novo mutation). Our aim in this section is to study the relative importance of  
257 standing variation vs new mutation in two-locus rescue. In the Appendix, treat both the  $Ab$

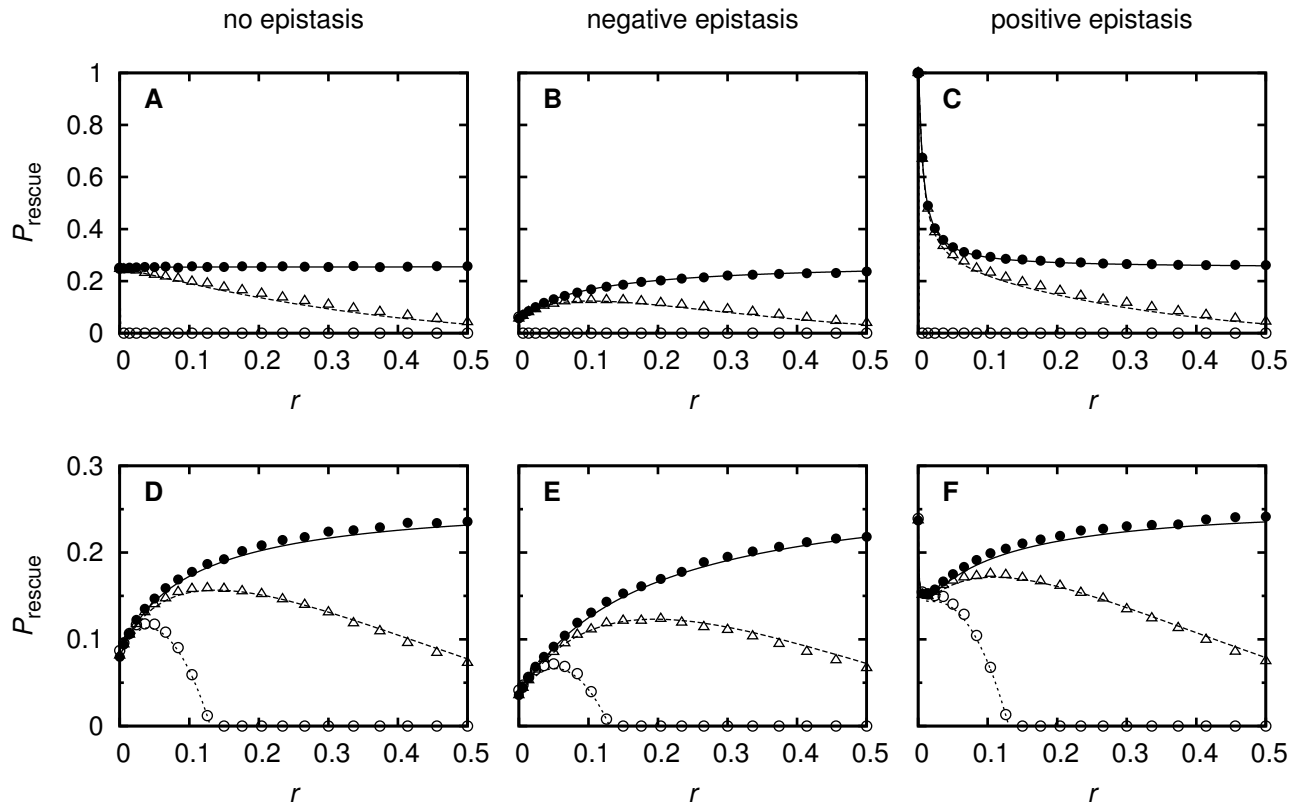

**Fig. 1: Probability of evolutionary rescue as a function of recombination when single mutants are lethal in the new environment.** Filled circles correspond to an instantaneous elimination of the wildtype ( $s_{ab} = -1$ ), triangles to an extremely fast ( $s_{ab} = -0.99$ ) and empty circles to a slow ( $s_{ab} = -0.005$ ) decay of the wildtype population size. Before the switch in the environment, selection against the single mutants is  $\sigma_{Ab} = \sigma_{aB} = -0.01$ , and epistasis is absent (Panels A+D;  $\sigma_{AB} = -0.0199$ , i.e.  $E_1 = 0$ ), negative (Panels B+E;  $\sigma_{AB} = -0.1$ , i.e.  $E_1 \approx -0.08$ ), and positive (Panels C+F;  $\sigma_{AB} = -0.0001$ , i.e.  $E_1 \approx 0.02$ ). The other parameter values are:  $u = 10^{-5}$ ;  $s_{AB} = 0.0015$  and  $N_0 = 10^8$  (Panels A–C);  $s_{AB} = 0.15$  and  $N_0 = 10^6$  (Panels D–F). The theoretical curves are based on Eq. (S3.1) (for  $s_{ab} = -1$ ), Eq. (S3.10) (for  $s_{ab} = -0.005$ ), and Eq. (S3.12) (for  $s_{ab} = -0.99$ ). Symbols denote simulation results. Each simulation point is the average of  $10^5$  replicates.

258 single mutants and the  $AB$  double mutants stochastically, using a two-type branching process,  
 259 to derive the rescue probability. This is necessary for a quantitatively precise approximation.  
 260 For a qualitative assessment of the relative importance of rescue pathways, it is sufficient to  
 261 stick to a simple deterministic treatment of all single mutant dynamics.

262 If the wildtype is either lethal or disappears sufficiently slowly, each single mutant has approx-  
 263 imately the same chance to generate a permanent lineage of  $AB$  mutants, independently of  
 264 whether it is already present at the time of environmental change or arises later. In order to  
 265 compare the relative importance of pathways (b) and (c), it is hence sufficient to compare the  
 266 number of  $Ab$  mutants in the standing genetic variation  $\sim \frac{uN_0}{-\sigma_{Ab}}$  with the number of  $Ab$  mu-  
 267 tants that get newly generated during population decline  $\sim \frac{uN_0}{-s_{ab}}$  (assuming  $n_{ab} \approx K(1 + s_{ab})^t$ ).  
 268 Accordingly, the contribution from pathway (c) is larger than that from (b) if  $s_{ab} > \sigma_{Ab}$ .  
 269 In order to compare pathways (a) and (b), we compare the exponent of Eq. (8), assuming  
 270  $\sigma_{Ab} = \sigma_{aB}$ , with the number of successful  $AB$  mutants issued from  $Ab$  mutants in the standing  
 271 genetic variation. If we assume a deterministic decay of the  $Ab$  mutants in the new environment,  
 272  $n_{Ab}(t) \approx \bar{n}_{Ab}(1 + s_{Ab})^t$ , the latter is given by  $p_{\text{est}}^{(AB)} \sum_{t=0}^{\infty} un_{Ab}(t) = p_{\text{est}}^{(AB)} \frac{u^2 N_0}{\sigma_{Ab} s_{Ab}}$ , where  $p_{\text{est}}^{(AB)} \approx 2s_{AB}$   
 273 if the wildtype is lethal and  $p_{\text{est}}^{(AB)} \approx 2 \max[(s_{AB} - r), 0]$  if the wildtype disappears slowly. With  
 274  $E_1 = 0$  or  $r$  large, this contribution is larger than rescue via pathway (a) if  $s_{Ab} > \sigma_{Ab}$ , i.e., if  
 275 the growth parameter of single mutants is larger in the new than in the old environment; for  
 276  $r \rightarrow 0$ , it is larger if  $s_{Ab} > \sigma_{Ab} + \frac{E_1}{2} \approx \frac{1}{2}\sigma_{AB}$ . Overall, we obtain for rescue via pathway (b) or

277 (c):

$$P_{\text{rescue}}^{\text{de-novo}} \approx 1 - e^{-\frac{u^2 N_0}{\sigma_{Ab} s_{Ab}} p_{\text{est}}^{(AB)} - \frac{u^2 N_0}{s_{ab} s_{Ab}} p_{\text{est}}^{(AB)}}, \quad (9)$$

278 where the first summand in the exponent accounts for pathway (b) and the second summand  
279 for pathway (c), using that every single mutant leaves on average  $\frac{u}{-s_{Ab}}$  double mutant offspring.

280 If the wildtype is lethal (Fig. 2A), the contribution of route (b) to rescue is independent of  
281 recombination, and recombination has an influence on rescue only via its effect on the number  
282 of double mutants in the standing genetic variation (compare Fig. 2A with Fig. 1D). If the  
283 wildtype is viable (Fig. 2B), recombination is deleterious after the environmental change (cf.  
284 Fig. 1).

285 The more precise analysis in Appendix S3.2 extends to  $s_{Ab} > 0$ . Then, rescue does not re-  
286 quire the generation of the double mutant. We discuss in the Appendix, when focussing on  
287 establishment of type  $Ab$  is sufficient under these conditions.

### 288 **Scheme 3: Both single mutants are viable in the new environment**

289 In our third scheme, we turn to scenarios in which single mutants have absolute fitness  $0 <$   
290  $1 + s_{Ab}, 1 + s_{aB} < 1$  in the new environment such that the last pathway to rescue opens up:  
291 in addition to the previous routes, the rescue mutant can now be generated by recombination  
292 after the environmental change. As in the phase prior to the environmental switch, the net role  
293 of recombination after the environmental change depends on the linkage disequilibrium among

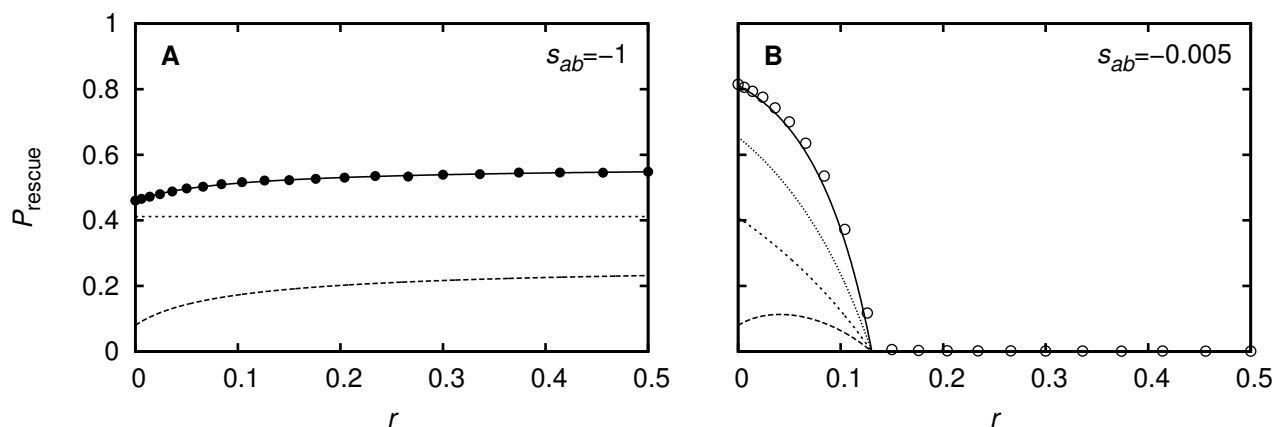

**Fig. 2: Probability of evolutionary rescue as a function of recombination when one single mutant is lethal and the other one viable.** In Panel A, the wildtype is lethal; in Panel B, it is only mildly deleterious. Solid line (with simulation dots): total probability of evolutionary rescue; long-dashed line: rescue only via double mutants from the standing genetic variation; short-dashed line: rescue via single mutants from the standing genetic variation (which subsequently mutate); dotted line (only Panel B): rescue from two-step de-novo mutation. Parameter values:  $\sigma_{Ab} = \sigma_{aB} = -0.01$ ,  $\sigma_{AB} = -0.0199$  (i.e., no epistasis before the environmental change),  $s_{Ab} = -0.005$ ,  $s_{aB} = -1$ ,  $s_{AB} = 0.15$ ,  $u = 10^{-5}$ ,  $N_0 = 10^6$ . The theoretical curves are based on Eq. (S3.14) (Panel A) and Eq. (S3.20) (Panel B). Each simulation point is the average of  $10^5$  replicates.

294 types: with negative LD, the net effect of recombination is to generate rescue mutants, with  
295 positive LD, it rather breaks them up. The expected LD, in turn, depends on the growth rates  
296 (fitnesses) of the four types: positive/negative epistasis entails positive/negative LD. With a  
297 switch in the selection regime at the time of environmental degradation, we can thus distinguish  
298 four basic scenarios, combining positive or negative epistasis before the switch with either  
299 positive or negative epistasis after the change, keeping or reversing the role of recombination.

300 For our analysis, we consider two cases for the fitness scheme after the environmental change:  
301 (1) negative epistasis with  $s_{Ab} = s_{aB} = s$  and  $s_{ab} = -1$  (i.e., the wildtype is lethal) and (2)  
302 positive epistasis with  $s_{ab} \geq s_{Ab} = s_{aB} = s$ . Epistasis in the original environment is positive or  
303 negative. For simplicity, we assume equal single-mutant fitnesses,  $\sigma_{Ab} = \sigma_{aB} = \sigma$ . Note that,  
304 with this choice, we have  $n_{Ab}(t) = n_{aB}(t)$  for all times, as long as drift can be ignored.

305 Rescue from double mutants in the standing genetic variation can be evaluated as above  
306 (Scheme 1) with  $p_{\text{est}}^{(AB)} \approx 2s_{AB}$  for scenario 1 and  $p_{\text{est}}^{(AB)} \approx 2 \max[s_{AB} - r, 0]$  for scenario 2.  
307 In order to determine the total probability of evolutionary rescue, we need to add rescue from  
308 double mutants that originate after the environmental change. These are generated at a time-  
309 dependent rate  $\left( r \frac{n_{Ab}(t)n_{aB}(t)}{N(t)} + u(n_{Ab}(t) + n_{aB}(t)) \right)$ . In scenario (1), with  $n_{Ab}(t) = n_{aB}(t)$  and  
310  $N(t) = n_{Ab}(t) + n_{aB}(t)$  (which holds as long as the  $AB$  mutant is rare), this simplifies to  
311  $\left( \frac{r}{2} + 2u \right) n_{Ab}(t)$ . The rate of decline of single mutants is considerably enhanced by recombina-  
312 tion in this scenario, since half of all recombination events occur among  $Ab$  and  $aB$  types. Each  
313 such recombination event breaks both single mutants up. The single mutant types hence decay

314 at rate  $|s - \frac{r}{2} - u|$ , generating approximately  $\sum_{t=0}^{\infty} (\frac{r}{2} + 2u) n_{Ab}(t) = \frac{\frac{r}{2} + 2u}{\frac{r}{2} - s - u} \bar{n}_{Ab}$  double mutants  
 315 on their way to extinction. Each of these double mutants establishes a permanent lineage with  
 316 probability  $2s_{AB}$ . The combination of these two rescue pathways – generation of the rescue  
 317 type by mutation or recombination after the environmental change – is hence given by

$$P_{\text{rescue}}^{\text{de-novo}} = 1 - e^{-2s_{AB} \frac{\frac{r}{2} + 2u}{\frac{r}{2} + 2u - s} \cdot \frac{uN_0}{-\sigma}}, \quad (10)$$

318 which increases with  $r$ . If epistasis is negative prior to the environmental change, recombination  
 319 is hence advantageous in both phases and  $P_{\text{rescue}}$  increases with  $r$  (Fig. 3A). If, on the other hand,  
 320 epistasis is positive in the old environment, the effect of recombination changes from negative  
 321 to positive between the two phases. The negative effect in the old environment and the positive  
 322 effect in the new environment act on different recombination scales: the negative effect levels  
 323 off for  $r \gg 2|\sigma|$  (see Eq. (8)). As can be seen from Eq. (10), the positive effect of recombination  
 324 levels off once  $r \gg -s$ . In Fig. 3B, selection is stronger in the new environment ( $|s| \ll |\sigma|$ ).  
 325 Moreover,  $P_{\text{rescue}}^{\text{de-novo}}$  is small for weak recombination, since the single mutants decay rapidly after  
 326 the environmental change. Therefore, the negative effect of recombination dominates for small  
 327  $r$ ; the positive effect takes over as recombination increases.

328 Scenario (2), used in Fig. 3C+D, is more complex. The proportion of single mutants changes  
 329 during population decline (even for  $s_{ab} = s$ , since new single mutants arise during population  
 330 decline). The rate at which single mutants recombine to generate double mutants is hence not  
 331 constant and the approximation for the total number of double mutants that get newly gener-

ated after the environmental change does not take a simple form. However, it is still possible to calculate it analytically, see Eq. (S3.37) and (S3.43a) in S3. Due to the presence of the wildtype, the rate is much smaller than  $\frac{1}{2}$ . Moreover, recombination reduces the establishment probability of the rescue mutant to  $p_{\text{est}}^{(AB)} \approx 2 \max[s_{AB} - r, 0]$ , rendering rescue impossible for strong recombination. If epistasis is negative prior to the environmental change such that  $AB$  mutants are underrepresented in the standing genetic variation without the aid of recombination, we find that  $P_{\text{rescue}}(r)$  displays an intermediate maximum (Fig. 3C, and Fig. S3.3). If epistasis is positive both in the old and in the new environment, deterministic theory predicts that recombination is always harmful. However, in finite populations with a small number of double mutants, recombination has a positive effect by attenuating the effect of drift (as described for Scheme 1, Fig. 1). As a consequence,  $P_{\text{rescue}}$  displays a minimum and a maximum in Panel D of Fig. 3.

#### **Scheme 4: Both single mutants have fitness greater than one**

If single mutants have fitness greater than one, formation of the double mutant is not required for rescue, but can still increase the rate of rescue if the double mutant is considerably fitter than the single mutants. However, formation of the double mutant comes at the cost of losing two single mutants. Keeping the single mutants intact can therefore be better for rescue than generating the double mutant if the latter is only slightly fitter than the single mutants.

For simplicity, we consider scenario 1 from the previous section with lethal wildtype after the



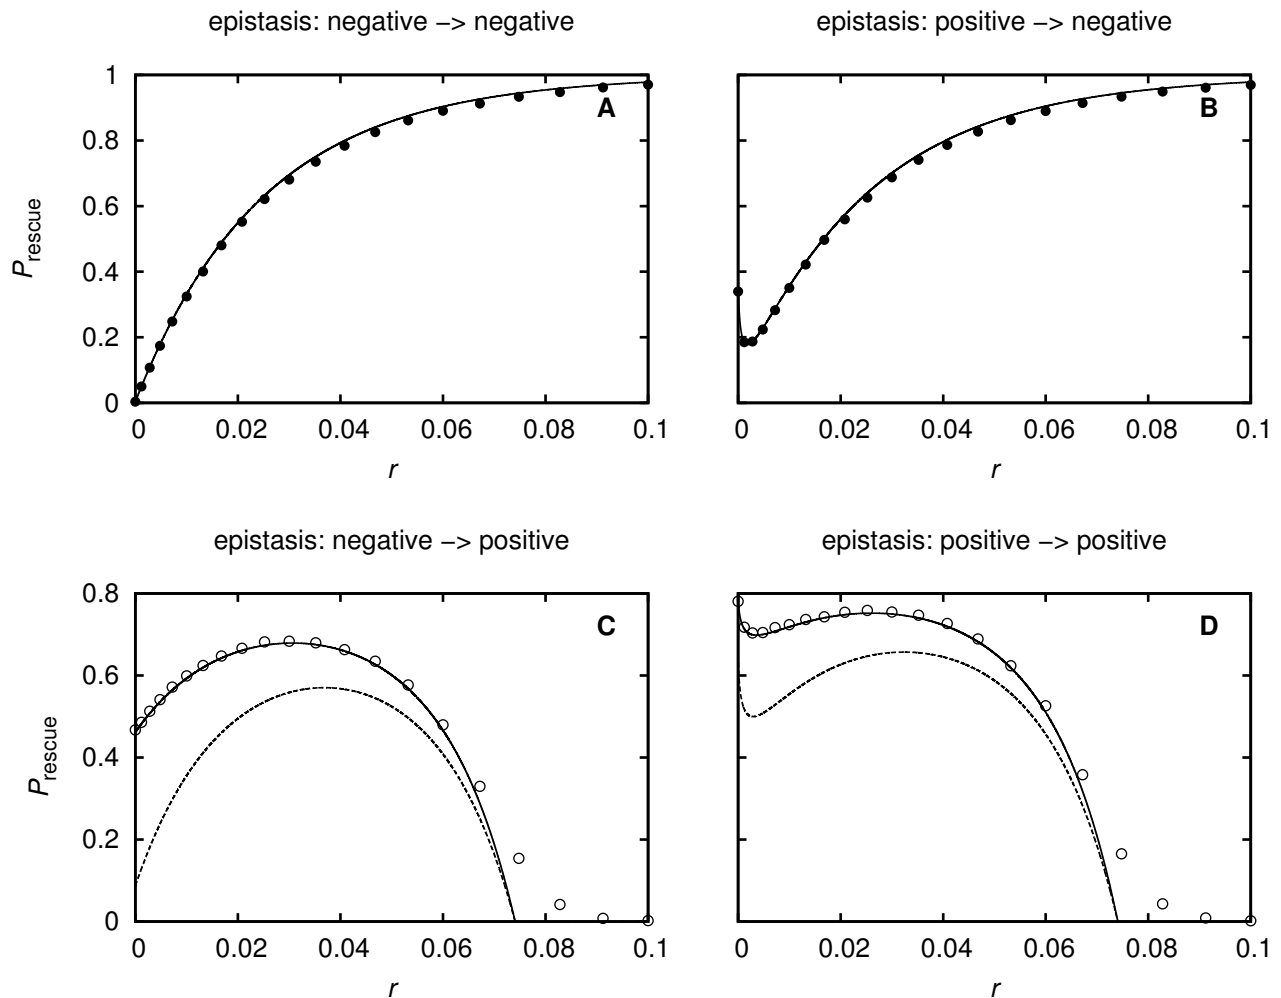

**Fig. 3: Probability of evolutionary rescue as a function of recombination for different patterns of epistasis before and after the environmental change.** Solid line: total probability of rescue; dashed line: probability of rescue from the standing genetic variation (i.e., without new mutations after the environmental change). In Panels A and B, both lines coincide. The analytical predictions in Panels A and B are based on Eq. (S3.32) and its components; the analytical predictions in Panels C and D are based on Eq. (S3.38) and its components. Parameter values:  $N_0 = 10^8$ ,  $u = 2 \cdot 10^{-6}$ ,  $\sigma_{Ab} = \sigma_{aB} = -0.01$ ; first row (A+B):  $s_{Ab} = s_{aB} = -0.5$ ,  $s_{ab} = -1$ ,  $s_{AB} = 0.002$ , and  $\sigma_{AB} = -0.1$  (i.e.,  $E_1 \approx -0.08$ , Panel A),  $\sigma_{AB} = -0.0001$  (i.e.,  $E_1 \approx 0.02$ , Panel B); second row (C+D):  $s_{ab} = s_{Ab} = s_{aB} = -0.03$ ,  $s_{AB} = 0.08$ , and  $\sigma_{AB} = -0.1$  (i.e.,  $E_1 \approx -0.08$ , Panel C),  $\sigma_{AB} = -0.0001$  (i.e.,  $E_1 \approx 0.02$ , Panel D). Symbols denote simulation results. Each simulation point is the average of  $10^5$  replicates.

351 change but allow  $s_{Ab} = s_{aB} = s$  to be greater than zero. Under these conditions, recombination  
352 cannot break the double mutant after the change in the environment. The role of recombination  
353 simply is to convert the different rescue types into each other, more precisely to turn two single  
354 mutants (that are now also rescue genotypes) into one double mutant. One individual of type  
355  $AB$  establishes a permanent lineage with probability  $\approx 2s_{AB}$  whilst one individual of type  
356  $Ab$  (or  $aB$ ) establishes a permanent lineage of single mutants with probability  $2s$ . Intuitively,  
357 conversion of two single mutants into one double mutants therefore pays off if  $s_{AB} \gg 2s$  and is  
358 deleterious for rescue if  $s_{AB} \ll 2s$ . Recombination hence increases the rate of rescue if  $s_{AB} \gg 2s$   
359 and decreases the rate of rescue if  $s_{AB} \ll 2s$ ; it has little effect if  $s_{AB} \approx 2s$  (see Fig. 4). We  
360 formalize this argument in Appendix S3.4.

## 361 **Notable observations**

362 To conclude, we point out two effects of recombination on rescue probabilities which might  
363 contradict spontaneous intuition. First, with recombination, a high frequency of wildtype  
364 individuals after the environmental change is a potent force to inhibit rescue by double mutants.  
365 Consequently, a slower decay of the wildtype population often reduces, rather than promotes,  
366 the chances for population survival. While a slower decay leads to a higher rate of new single  
367 mutants, the latter are less likely to meet and recombine in the presence of a dominating  
368 wildtype. Also, if a double mutant is generated, it is likely to be broken up by recombination.  
369 Depending on the strength of recombination, the rate of rescue decreases or increases or displays

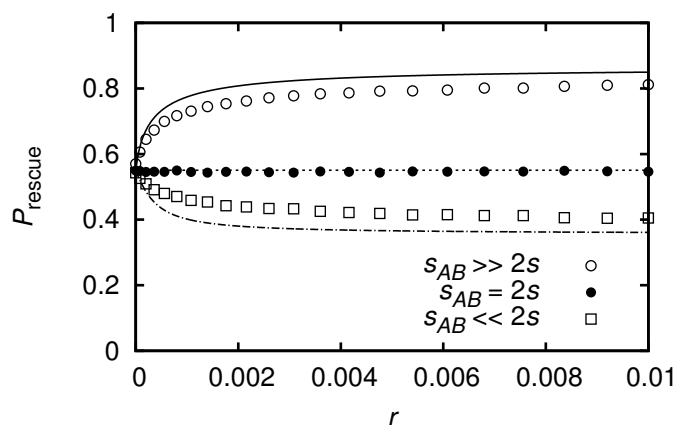

**Fig. 4: Probability of evolutionary rescue as a function of recombination.** For  $s_{AB} \gg 2s$ ,  $P_{\text{rescue}}$  increases with recombination; for  $s_{AB} = 2s$ , recombination has no effect on rescue; for  $s_{AB} \ll 2s$ ,  $P_{\text{rescue}}$  decreases with recombination. Parameter values:  $N_0 = 10^7$ ,  $u = 2 \cdot 10^{-6}$ ,  $\sigma_{Ab} = \sigma_{aB} = -0.01$ ,  $\sigma_{AB} = -0.0199$ ,  $s_{ab} = -1$ ,  $s_{Ab} = s_{aB} = 10^{-4}$ ; empty circles:  $s_{AB} = 5 \cdot 10^{-4} \gg 2s$ ; filled circles:  $s_{AB} = 2 \cdot 10^{-4} = 2s$ ; squares:  $s_{AB} = 0.11 \cdot 10^{-4} \ll 2s$ . The theoretical predictions are based on Eq. (S3.45) combined with Eq. (S3.1). Symbols denote simulation results. For the simulations, we consider the population as rescued if the total number of mutant genotypes has reached 20% carrying capacity. Each simulation point is the average of  $10^5$  replicates.

370 an intermediate minimum as a function of the wildtype fitness (see Fig. 5A; cf. also Fig. S3.3).  
371 Indeed, we obtain a clear decrease in  $P_{\text{rescue}}$  for almost the entire range of wildtype fitness  
372  $s_{ab}$ , unless recombination is extremely weak. Only for very high wildtype fitness, approaching  
373 viability ( $s_{ab} = 1$ ),  $P_{\text{rescue}}$  steeply increases again (cf. Fig. 5A).

374 Second, with recombination, single mutant types can act as an important buffer to environ-  
375 mental change, even if they are not able to rescue a population on their own. As a consequence,  
376 two-step rescue does not need to be less likely than single-step rescue with a single locus and di-  
377 rect generation of the rescue type from the wildtype by a single mutation (see Fig. 5B). Imagine  
378 a situation where the wildtype is lethal in the new environment. Single-step rescue now relies  
379 entirely on the rescue type individuals that are present at the time of environmental change. In  
380 two-step rescue, single mutants might still be present in the new environment and can generate  
381 the rescue mutant by mutation or recombination at a high rate. Even the number of double  
382 mutants in the standing genetic variation can be higher for two-step than for single-step rescue  
383 if the mutation rate is high or epistasis strongly positive (see Appendix S3.5 for more details).

## 384 Discussion

385 Following severe environmental change, populations might find themselves maladapted to the  
386 new conditions, and a race between population decline and adaptive evolution begins. In con-  
387 servation biology, the desired outcome of this race is persistence of the population; in medicine,  
388 in contrast, one aims at eradication of the pathogen from the human body. Adaptation to the

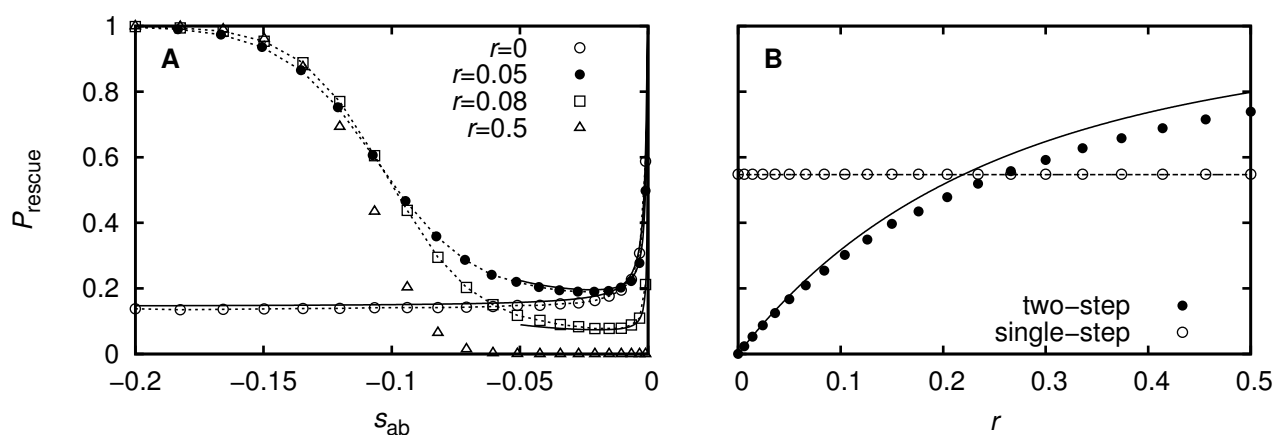

**Fig. 5: Probability of evolutionary rescue.** Panel A: Probability of evolutionary rescue as a function of wildtype fitness for various values of  $r$ . Solid curves constitute analytical predictions and are based on Eq. (S2.2) ( $r = 0$ ) and Eq. (S3.38) with Eq. (S3.43a) ( $r > 0$ ). Dotted lines connect simulation points and are included to guide the eye. Parameter values:  $\sigma_{Ab} = \sigma_{aB} = -0.01$ ,  $\sigma_{AB} = -0.0199$ ,  $s_{Ab} = s_{aB} = -0.05$ ,  $u = 10^{-5}$ ,  $N_0 = 10^6$ ,  $s_{AB} = 0.1$ . Panel B: Probability of evolutionary when the rescue mutant is one or two mutational steps away. The analytical predictions are based on Eq. (S3.32) (for two-step rescue) and Eq. (S3.49) (for single-step rescue). Parameter values:  $u = 2 \cdot 10^{-6}$ ,  $N_0 = 10^7$ ,  $\sigma_{Ab} = \sigma_{aB} = -0.01$ ,  $\sigma_{AB} = -0.1$ ,  $s_{ab} = -1$ ,  $s_{Ab} = s_{aB} = -0.5$ ,  $s_{AB} = 0.002$ . Symbols denote simulation results. For Panel A, we consider a population as rescued when the number of double mutants has reached 20% carrying capacity (increasing the threshold to 30% did not change the results). Each simulation point is the average of  $10^5$  replicates.

389 new environmental conditions is often contingent on allelic changes at more than one locus.  
390 This holds, in particular, for resistance to multiple drugs in combination drug therapy or pesti-  
391 cide mixtures in agriculture. Complex rescue, requiring adaptation at multiple loci, is expected  
392 to lead to severely reduced probabilities of rescue (or resistance). However, the prediction of  
393 these probabilities can be surprisingly complicated if there is recombination among the target  
394 loci.

395 In this paper, we have analyzed a generic two-locus model in order to clarify the role of recom-  
396 bination in evolutionary rescue. We find that depending on the fitness scheme of mutations,  
397 recombination can make two-step rescue even more likely to happen than single-step rescue but  
398 it can also prevent rescue entirely (see Fig. 3C+D, and Fig. 5B). Recombination acts to reduce  
399 positive or negative LD that is build up by epistasis and it weakens fluctuations in LD caused  
400 by genetic drift. Since there are two phases of selection – before and after the environmental  
401 change – and drift, recombination acts threefold, where the effects can go in different directions  
402 (increasing or decreasing the rate of rescue) and show at different scales. As a consequence,  
403 dependence of rescue on recombination can be non-monotonic with multiple ups and downs (see  
404 e.g. Fig. 3D). Also the dependence of rescue on the wildtype dynamics is non-trivial, with a slow  
405 decline of the wildtype not always being better for population survival than a fast eradication  
406 (see Fig. 5A).

407 **The role of epistasis** As well-known from classical population genetics, whether recombi-  
408 nation speeds up or slows down adaptation strongly depends on the sign of epistasis (FELSEN-

409 STEIN, 1965). In scenarios of evolutionary rescue, there are two phases of selection with poten-  
410 tially epistatic interactions between loci, before and after the change in the environment, and  
411 the role of recombination is affected by epistasis in both phases. Experimentally, the strength  
412 and sign of epistasis have been measured across a variety of systems (BONHOEFFER *et al.*,  
413 2004; KOUYOS *et al.*, 2007; TRINDADE *et al.*, 2009; SILVA *et al.*, 2011), reporting all forms of  
414 epistasis. Moreover, several studies have investigated the influence of the environment on the  
415 epistatic interactions between mutations, finding that both the strength and the sign of epis-  
416 tasis can change as the environment changes (REMOLD and LENSKI, 2004; LALIC and ELENA,  
417 2012; DE VOS *et al.*, 2013; FLYNN *et al.*, 2103). This shows that for a comprehensive picture  
418 of the role of epistasis on adaptation upon environmental change, all possible fitness schemes  
419 in both environments need to be studied.

420 Epistasis leads to linkage disequilibrium which is broken up by recombination. Recombination  
421 thus counteracts selection. The scale at which recombination is effective is determined by the  
422 strength of epistatic selection. Since the strength of selection can be different before and after  
423 the environmental change, the relevant recombination scales can be different, too, and if the  
424 sign of epistasis changes with the environment, the probability of evolutionary rescue depends  
425 non-monotonically on recombination.

426 We can compare our results with classical models for the crossing of fitness valleys in populations  
427 of constant size. In these models, a small but non-zero recombination rate minimizes the time  
428 to get from one fitness peak to another, while strong recombination hampers or even prevents

429 the crossing of valley in large populations (JAIN, 2010; WEISSMAN *et al.*, 2010; ALTLAND *et al.*,  
430 2011). Epistasis is positive in this scenario. However, since double mutants are initially absent,  
431 LD is negative during a first transient phase. As the frequency of double mutants increases  
432 (supported by recombination), LD turns positive and recombination counteracts any further  
433 increase of double mutants. The valley-crossing scenario thus compares to a rescue situation  
434 with negative epistasis in the old and positive epistasis in the new environment. Indeed, we  
435 obtain analogous results under these conditions (see Fig. 3C).

436 **The role of drift** We find that genetic drift has a strong influence on rescue probabilities,  
437 even in very large populations (see e.g. Fig. S2.1 with  $N_0 = 10^8$ ). This may seem surprising, but  
438 can be understood because the decisive quantity for rescue is the number of double mutants,  
439 which is potentially small even if the total population size is large. Importantly, stochastic  
440 fluctuations in the number of rescue types do not only entail a stochastic outcome (extinction  
441 or survival), but also have a directional (negative) effect on the rescue probability. This is  
442 because for any given population, the probability of evolutionary rescue is a concave function  
443 of the number of rescue mutants in the standing genetic variation. Consequently, the decrease  
444 in the rescue probability due to negative fluctuations in the number of rescue types is larger  
445 than the corresponding increase due to positive fluctuations. This effect is strong if the number  
446 of double mutants is small and their establishment probability large.

447 The effect is most prominent for two-step adaptation at a single locus, i.e., in the absence of  
448 recombination. Previous theory for two-step rescue for that case has described all genotype



449 frequencies in the standing genetic variation deterministically (IWASA *et al.*, 2003, 2004). While  
450 this is appropriate when the number of double mutants is large and their establishment proba-  
451 bility small, the approach strongly overestimates the probability of evolutionary rescue if these  
452 conditions are not met (see S2 and Fig. S2.1).

453 Recombination attenuates this effect of drift by pulling the number of double mutants closer  
454 to its expected value and thus increases the probability of rescue. We find that the decrease of  
455 fluctuations in LD (and in the number of double mutants) affects rescue equally or sometimes  
456 even more strongly than the reduction of directional LD (increasing or decreasing the mean  
457 number of double mutants) which has been built up by epistasis. We finally note that the  
458 interaction of drift and recombination described here is different from the effect of recombination  
459 in the presence of Hill-Robertson interference in finite populations that has been described  
460 previously (BARTON and OTTO, 2005; ROZE, 2014). This latter mechanism works through a  
461 small bias towards negative LD on average because selection acts asymmetrically on symmetric  
462 fluctuations in LD. This is negligible in our model, while fluctuations in LD turn out to be very  
463 prominent.

464 **The population dynamics** As long as the rescue type is rare, the population dynamics  
465 are shaped by the dynamics of the wildtype and the single mutants. Dependence of rescue  
466 on the dynamics of single mutants is as expected: the slower the decay, the higher the chance  
467 of rescue. The dependence on the dynamics of the wildtype population size is more complex  
468 and shaped by two opposing effects. By mutation of wildtype individuals, single mutants

469 arise, which can subsequently mutate or recombine to generate the rescue type. On the other  
470 hand, recombination with wildtype individuals breaks the rescue type up. Presence of the  
471 wildtype hence increases the rate at which the rescue mutant is generated but decreases its  
472 establishment probability. As a consequence, dependence of rescue on the rate of decline of  
473 the wildtype population is non-trivial. We find that the rate of rescue decreases with wildtype  
474 fitness over a large parameter range but it can also increase and be overall non-monotonic  
475 as a function of wildtype fitness (see Fig. 5A). For strong recombination, a high frequency  
476 of wildtype individuals prevents rescue entirely. Importantly, dependence of rescue on the  
477 presence or absence of the wildtype can be very sensitive such that even a slight increase of the  
478 wildtype fitness above lethality can significantly reduce the probability of population survival  
479 (see Fig. 1).

480 Violations of the simple rule for drug therapy to “hit hard” (the faster the wildtype population  
481 disappears, the lower the risk of resistance) have been found before as a consequence of com-  
482 petitive release: if the fitness of the rescue type is density dependent, a fast eradication of the  
483 wildtype enhances rescue by freeing up resources (TORELLA *et al.*, 2010; READ *et al.*, 2011;  
484 PEÑA-MILLER *et al.*, 2013; UECKER *et al.*, 2014). Note that here, we find that the rule is vio-  
485 lated also in a model without competition for resources and with density-independent fitness.  
486 Our results imply that in order to prevent resistance, it is of vital importance to suppress the  
487 single mutants efficiently while it can be preferable to remove the wildtype slowly. Otherwise  
488 the single mutants can act as a reservoir for mutations from which the rescue type can be

489 generated even if the single mutants are not long-term viable themselves and even if they have  
490 a very low fitness (see Fig. S3.2). As a consequence, two-step rescue can be even more likely  
491 than single-step rescue (see Fig. 5B).

492 Normally, we expect that in the presence of several drugs, a mutant that is resistant to one  
493 of the drugs has a higher fitness than the wildtype strain. For example, CHAIT *et al.* (2007)  
494 find this behavior when they expose wildtype and doxycycline-resistant *E. coli* bacteria to a  
495 drug combination of doxycycline and erythromycin. The two drugs act synergistically, i.e., the  
496 wildtype has a lower fitness in the presence of both drugs than expected from the single-drug  
497 effects. In a combination of doxycycline and ciprofloxacin, however, CHAIT *et al.* (2007) show  
498 that the doxycycline-resistant mutant is even less fit than the wildtype at certain drug concen-  
499 trations (we apply such a fitness scheme in the limit of lethal single mutant(s) in Fig. 1 and  
500 in Fig. 2B). At these concentrations, the two drugs display “suppression interaction”, i.e., the  
501 wildtype has a higher fitness in the presence of both drugs than in the presence of just one drug,  
502 which is an extreme form of antagonistic drug interactions (one drug attenuates the effect of the  
503 other). Based on these findings, TORELLA *et al.* (2010) developed a mathematical model for the  
504 evolution of multi-drug resistance under synergistic and antagonistic drug interactions (imple-  
505 menting no form of recombination). The model shows that resistance evolves less easily under  
506 antagonistic interactions but again only if competition among cells is high (for experiments,  
507 see HEGRENESS *et al.* (2008)). Our results suggest that even without competition, antagonistic  
508 drug interactions (with a relatively fit wildtype but unfit single mutants) can strongly hamper

509 the evolution of resistance for infections with pathogens that readily recombine in vivo, such  
510 as HIV.

511 **Limitations and extensions** Our analysis gives a comprehensive overview of the role of  
512 recombination in the two-locus model for evolutionary rescue. However, quantitatively accurate  
513 analytical results are only possible in parts of the parameter range. Most importantly, if  
514 both single mutant types are viable and can recombine, we need to describe their frequencies  
515 deterministically. This requires a sufficiently large population size. We illustrate the limits of  
516 this approach in S4.

517 Our model describes the most basic situation both on the genetic and on the ecological side (two  
518 loci, two alleles per locus, panmictic population, sudden environmental shift). On the genetic  
519 side, the incorporation of more loci and the consideration of more complex fitness landscapes  
520 constitutes a logical next step. On the ecological side, a variety of extensions would help to  
521 gain a more comprehensive understanding of two-step rescue with recombination. A gradual  
522 instead of sudden deterioration of the environment influences the population dynamics which,  
523 as discussed above, plays a relevant role in rescue. Likewise, population structure with parts of  
524 the habitat deteriorating later than others changes the rate of disappearance of the wildtype  
525 (UECKER *et al.*, 2014).

526 Our “minimal model” approach means, of course, that the results cannot be directly applied  
527 to concrete cases of resistance evolution. While we expect that the basic principles observed in  
528 this study should hold under general conditions, further factors need to be included for specific

529 cases. For example, recombination in HIV is density dependent since multiple infection of a  
530 cell is required for recombination to occur. Also, phenotypic mixing does not allow for a simple  
531 correspondence between phenotype and genotype and long-lived cells lead to specific population  
532 dynamics. Likewise, all three forms of bacterial recombination – conjugation, transduction,  
533 transformation – differ significantly from the simple recombination scheme applied in this study,  
534 requiring two mating types, the action of bacteriophages, or the release and uptake of DNA  
535 molecules into/from the environment.

536 We entirely focused on the probability of evolutionary rescue, leaving other aspects of rescue  
537 unexplored. It would be interesting to find out how recombination affects the time to rescue  
538 and the shape of population decline and recovery given rescue occurs (cf. ORR and UNCKLESS  
539 (2014) for a study on these aspects in a one-locus model). The minimum population size of  
540 the U-shaped rescue curve is predictive for the amount of standing genetic variation that is  
541 preserved over the course of adaptation. The latter in turn affects how well a population can  
542 respond to subsequent environmental change.

543

544

545 To summarize, we have analyzed a generic model of two-step rescue with recombination. We  
546 find that the role of recombination in rescue is complex and ambivalent, ranging from highly  
547 beneficial to highly detrimental. Since recombination of rescue mutants with wildtype individ-  
548 uals destroys the rescue type, a fast eradication of the wildtype can counterintuitively promote

549 rescue even in the absence of competition for resources. A high fitness of single mutants always  
550 fosters rescue even if they cannot persist at long-term in the environment themselves. Recom-  
551 bination of single mutants that provide a buffer to environmental change can render two-step  
552 rescue even more likely than one-step rescue.

## 553 Acknowledgments

554 The authors thank Nick Barton, Sally Otto, Denis Roze, and Jitka Polechová for helpful discus-  
555 sions and/or comments on the manuscript. This work was made possible by by a “For Women  
556 in Science” fellowship (L’Oréal Österreich in cooperation with the Austrian Commission for  
557 UNESCO and the Austrian Academy of Sciences with financial support from the Federal Min-  
558 istry for Science and Research Austria) and European Research Council Grant 250152 (to Nick  
559 Barton).

## References

- AGASHE, D., J. J. FALK, and D. I. BOLNICK, 2011 Effects of founding genetic variation on adaptation to a novel resource. *Evolution* **65**: 2481–2491.
- ALEXANDER, H. K., G. MARTIN, O. Y. MARTIN, and S. BONHOEFFER, 2014 Evolutionary rescue: linking theory for conservation and medicine. *Evolutionary applications* **7(10)**: 1161–1179.

- ATTLAND, A., A. FISHER, J. KRUG, and I. G. SZENDRO, 2011 Rare events in population genetics: Stochastic tunneling in a two-locus model with recombination. *Physical Review Letters* **106**: 088101.
- BARTON, N. H., and B. CHARLESWORTH, 1998 Why sex and recombination? *Science* **281(5385)**: 1986–1990.
- BARTON, N. H., and S. P. OTTO, 2005 Evolution of recombination due to random drift. *Genetics* **169**: 2353–2370.
- BELL, G., and S. COLLINS, 2008 Adaptation, extinction and global change. *Evolutionary Applications* **1(1)**: 3–16.
- BELL, G., and A. GONZALEZ, 2009 Evolutionary rescue can prevent extinction following environmental change. *Ecology Letters* **12**: 942–948.
- BELL, G., and A. GONZALEZ, 2011 Adaptation and evolutionary rescue in metapopulations experiencing environmental deterioration. *Science* **332**: 1327–1330.
- BONHOEFFER, S., C. CHAPPEY, N. T. PARKIN, J. M. WHITCOMB, and C. J. PETROPOULOS, 2004 Evidence for positive epistasis in HIV-1. *Science* **306 (5701)**: 1547–1550.
- BRETSCHER, M. T., C. L. ALTHAUS, V. MÜLLER, and S. BONHOEFFER, 2004 Recombination in HIV and the evolution of drug resistance: for better or for worse? *BioEssays* **26**: 180–188.

- BÜRGER, R., and M. LYNCH, 1995 Evolution and extinction in a changing environment: A quantitative genetic analysis. *Evolution* **49**: 151–163.
- CARLSON, S. M., C. J. CUNNINGHAM, and P. A. H. WESTLEY, 2014 Evolutionary rescue in a changing world. *Trends in Ecology & Evolution* **29**: 521–530.
- CARVAJAL-RODRÍGUEZ, A. C., K. A. CRANDALL, and D. POSADA, 2007 Recombination favors the evolution of drug resistance in HIV-1 during antiretroviral therapy. *Infection, Genetics and Evolution* **7**: 476–483.
- CHAIT, R., A. CRANEY, and R. KISHONY, 2007 Antibiotic interactions that select against resistance. *Nature* **446**: 668–671.
- CROW, J. F., and M. KIMURA, 1965 Evolution in sexual and asexual populations. *The American Naturalist* **99(909)**: 439–450.
- DE VOS, M. G. J., F. J. POELWIJK, N. BATTICH, J. D. T. NDIKA, and S. J. TRANS, 2013 Environmental dependence of genetic constraint. *PLoS Genetics* **9(6)**: e1003580.
- DUPUTIÉ, A., F. MASSOL, I. CHUINE, M. KIRKPATRICK, and O. RONCE, 2012 How do genetic correlations affect species range shifts in a changing environment. *Ecology Letters* **15**: 251–259.
- FELSENSTEIN, J., 1965 The effect of linkage on directional selection. *Genetics* **52(2)**: 349–363.



- FLYNN, K. M., T. F. COOPER, F. B.-G. MOORE, and V. S. COOPER, 2103 The environment affects epistatic interactions to alter the topology of an empirical fitness landscape. *PLoS Genetics* **9(4)**: e1003426.
- FRASER, C., 2005 HIV recombination: what is the impact on antiretroviral therapy. *Journal of the Royal Society Interface* **2**: 489–503.
- GALASSI, M., J. DAVIES, J. THEILER, B. GOUGH, G. JUNGMAN, *et al.*, 2009 *GNU Scientific Library Reference Manual*. Network Theory Ltd., Bristol, third edition.
- GOMULKIEWICZ, R., and R. D. HOLT, 1995 When does evolution by natural selection prevent extinction? *Evolution* **49**: 201–207.
- GONZALEZ, A., and G. BELL, 2013 Evolutionary rescue and adaptation to abrupt environmental change depends upon the history of stress. *Philosophical Transactions of the Royal Society B* **368**: 20120079.
- HALDANE, J. B. S., 1927 A mathematical theory of natural and artificial selection. v. selection and mutation. *Proceedings of the Cambridge Philosophical Society* **23**: 838–844.
- HARTFIELD, M., and D. KEIGHTLEY, 2012 Current hypotheses for the evolution of sex and recombination. *Integrative Zoology* **7**: 192–209.
- HEGRENESS, M., N. SHORESH, D. DAMIAN, D. HARTL, and R. KISHONY, 2008 Accelerated evolution of resistance in multidrug environments. *Proceedings of the National Academy of Sciences* **105(37)**: 13977–13981.

IWASA, Y., F. MICHOR, and M. A. NOWAK, 2003 Evolutionary dynamics of escape from biomedical intervention. *Proceedings of the Royal Society B* **270**: 2573–2578.

IWASA, Y., F. MICHOR, and M. A. NOWAK, 2004 Evolutionary dynamics of invasion and escape. *Journal of Theoretical Biology* **226**: 205–214.

JAIN, K., 2010 Time to fixation in the presence of recombination. *Theoretical Population Biology* **77**: 23–31.

KOUYOS, R. D., D. FOUCHET, and S. BONHOEFFER, 2009 Recombination and drug resistance in HIV: Population dynamics and stochasticity. *Epidemics* **1**: 58–69.

KOUYOS, R. D., O. K. SILANDER, and S. BONHOEFFER, 2007 Epistasis between deleterious mutations and the evolution of recombination. *TRENDS in Ecology and Evolution* **22(6)**: 308–315.

LACHAPELLE, J., and G. BELL, 2012 Evolutionary rescue of sexual and asexual populations in a deteriorating environment. *Evolution* **66(11)**: 3508–3518.

LALIC, J., and S. F. ELENA, 2012 Epistasis between mutations is host-dependent for an rna virus. *Biology Letters* **9(1)**: 20120396.

LANDE, R., and S. SHANNON, 1996 The role of genetic variation in adaptation and population persistence in a changing environment. *Evolution* **50(1)**: 434–437.

- LYNCH, M., W. GABRIEL, and A. M. WOOD, 1991 Adaptive and demographic responses of plankton populations to environmental change. *Limnol. Oceanogr.* **36(7)**: 1301–1312.
- MARTIN, G., R. AGUILÉE, J. RAMSAYER, O. KALTZ, and O. RONCE, 2013 The probability of evolutionary rescue: towards a quantitative comparison between theory and evolution experiments. *Philosophical Transactions of the Royal Society B* **368**: 20120088.
- ORR, H. A., and R. L. UNCKLESS, 2008 Population extinction and the genetics of adaptation. *The American Naturalist* **172(2)**: 160 – 169.
- ORR, H. A., and R. L. UNCKLESS, 2014 The population genetics of evolutionary rescue. *PLoS Genetics* **10(8)**: e1004551.
- OTTO, S. P., 2009 The evolutionary enigma of sex. *The American Naturalist* **174(S1)**: S1–S14.
- PEASE, L. M., R. LANDE, and J. J. BULL, 1989 A model of population growth, dispersal, and evolution in a changing environment. *Ecology* **70**: 1657–1664.
- PEÑA-MILLER, R., D. LAEHNEMANN, G. JANSEN, A. FUENTES-HERNANDEZ, P. ROSENSTIEL, *et al.*, 2013 When the most potent combination of antibiotics selects for the greatest bacterial load: the smile-frown transition. *PLoS Biology* **11(4)**: e1001540.
- POLECHOVÁ, J., N. H. BARTON, and G. MARION, 2009 Species' range: Adaptation in space and time. *The American Naturalist* **174(5)**: E186–204.

- READ, A. F., T. DAY, and S. HUIJBEN, 2011 The evolution of drug resistance and the curious orthodoxy of aggressive chemotherapy. *Proceedings of the National Academy of Sciences* **108**: 10871–10877.
- REMOLD, S. K., and R. E. LENSKI, 2004 Pervasive joint influence of epistasis and plasticity on mutational effects in *escherichia coli*. *Nature Genetics* **36**(4): 423–426.
- ROZE, D., 2014 Selection for sex in finite populations. *Journal of Evolutionary Biology* **27**: 1304–1322.
- SCHIFFERS, K., E. C. BOURNE, S. LAVERGNE, W. THULLER, and J. M. J. TRAVIS, 2013 Limited evolutionary rescue of locally adapted populations facing climate change. *Philosophical Transactions of the Royal Society B* **268**: 20120083.
- SILVA, R. F., S. C. M. MENDONÇA, L. M. CARVALHO, A. M. REIS, I. GORDO, *et al.*, 2011 Pervasive sign epistasis between conjugative plasmids and drug-resistance chromosomal mutations. *PLoS Genetics* **7**(7): e1002181.
- TORELLA, J. P., R. CHAIT, and R. KISHONY, 2010 Optimal drug synergy in antimicrobial treatments. *PLoS Computational Biology* **6**(6): e1000796.
- TRINDADE, S., A. SOUSA, K. B. XAVIER, F. DIONISIO, M. G. FERREIRA, *et al.*, 2009 Positive epistasis drives the acquisition of multidrug resistance. *PloS Genetics* **5**(7): e1000578.
- UECKER, H., and J. HERMISSON, 2011 On the fixation process of a beneficial mutation in a variable environment. *Genetics* **188**: 915–930.

UECKER, H., S. OTTO, and J. HERMISSON, 2014 Evolutionary rescue in structured populations. *The American Naturalist* **183**: E17–E35.

WEISSMAN, D. B., M. W. FELDMAN, and D. S. FISHER, 2010 The rate of fitness-valley crossing in sexual populations. *Genetics* **186**: 1389–1410.
